# Supplementary material for: Clinical and Economic Burden of Chronic Heart Failure and Reduced Ejection Fraction Following a Worsening Heart Failure Event
Source: Springer Nature journal article supplement (doi:10.1007/s12325-020-01456-1), 2020-08-06
Supplement: MOESM1 [file 18254408]

**SUPPLEMENTARY MATERIAL**

**Figure S1.** Inclusion and exclusion criteria and attrition of the study population

Patients having one inpatient claim or two outpatient claims of HFrEF (ICD-10: I50.2x, I50.4x, I50.1) or one outpatient claim of HFrEF plus one outpatient claim for any HF (ICD-10: I50.2x, I50.4x, I50.8x, I50.1, I50.3x, I11.0, I50.9) on two different dates within a 12-month period between January 1, 2016, and December 31, 2016.
**n=99,906**

Patients with continuous enrollment for at least 12 months
before the HFrEF index date

**n=84,530**

Patients with continuous enrollment for at least 12 months
after the HFrEF index date

**n=48,176**

Patients ≥18 years old at the HFrEF index date

**n=48,100**

No evidence of heart transplant, LVAD, adult congenital heart disease or amyloidosis during the 12 months prior to the HFrEF index date (baseline period)

**n=47,498**

Patients <65 years old

**n=16,646**

Patients <65 years old who did not have a worsening HF event
(ie, no hospitalization for HFrEF and/or use of IV diuretics
within 12 months post
HFrEF diagnosis)
**n=12,186**

Patients <65 years old who
had a worsening HF event
(ie, hospitalization for HFrEF and/or use of IV diuretics
within 12 months post
HFrEF diagnosis)
**n=4,460**

HF, heart failure; HFrEF, heart failure with reduced ejection fraction; ICD, International Statistical Classification of Diseases; IV, intravenous; LVAD, left ventricular assist device.
